# Supplementary material
Source: Springer Nature journal article supplement (https://www.springermedizin.de/resource/supplementary/12879_2012_1975_MOESM3_ESM.pdf/9443502)
Supplement: MOESM3 [file 9443502]

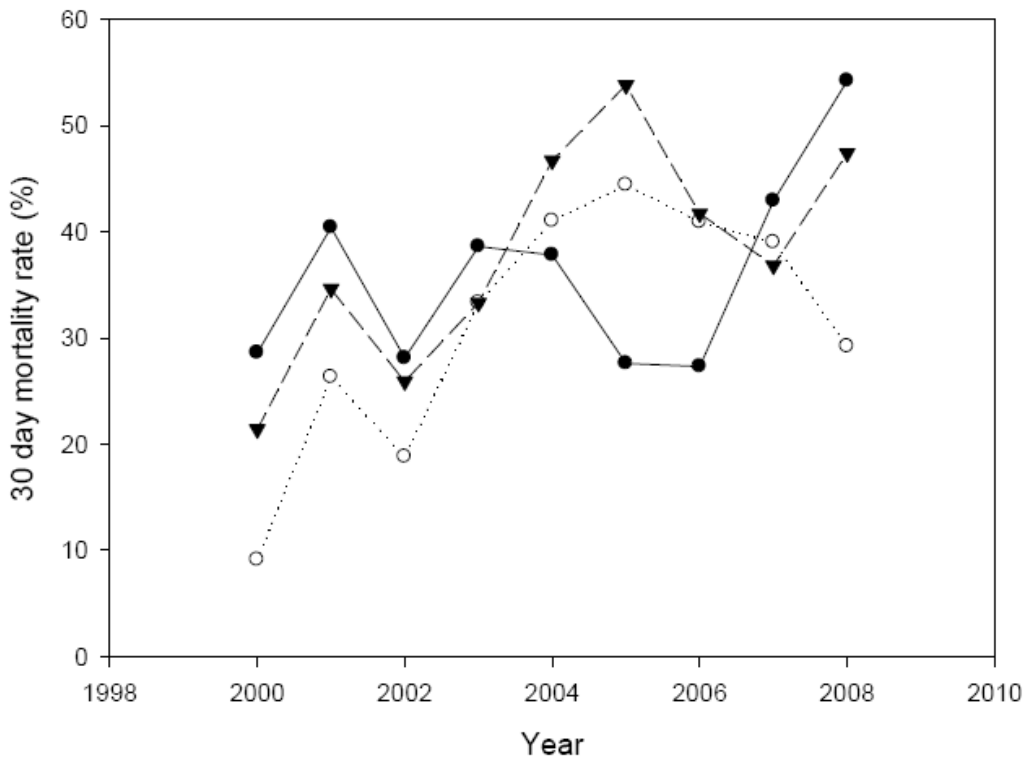

Total number of infected

|        |    |    |    |    |    |    |    |    |    |
|--------|----|----|----|----|----|----|----|----|----|
| VAP    | 21 | 47 | 32 | 44 | 45 | 29 | 22 | 28 | 24 |
| CAUTI  | 44 | 38 | 48 | 36 | 39 | 18 | 22 | 59 | 48 |
| CLABSI | 28 | 26 | 27 | 18 | 15 | 13 | 24 | 19 | 19 |

- Ventilator-associated pneumonia (VAP, mean 36.6%,  $p=0.278$ )
- Catheter-associated urinary tract infection (CAUTI, mean 29.8%,  $p=0.002$ )
- ▼— Central-line associated bloodstream infection (CLABSI, mean 36%,  $p=0.035$ )
